# Supplementary material
Source: publisher figshare collection journal article supplement (https://aacr.figshare.com/articles/dataset/_/23274981)
Supplement: Supplementary file 1 [file 41022618]

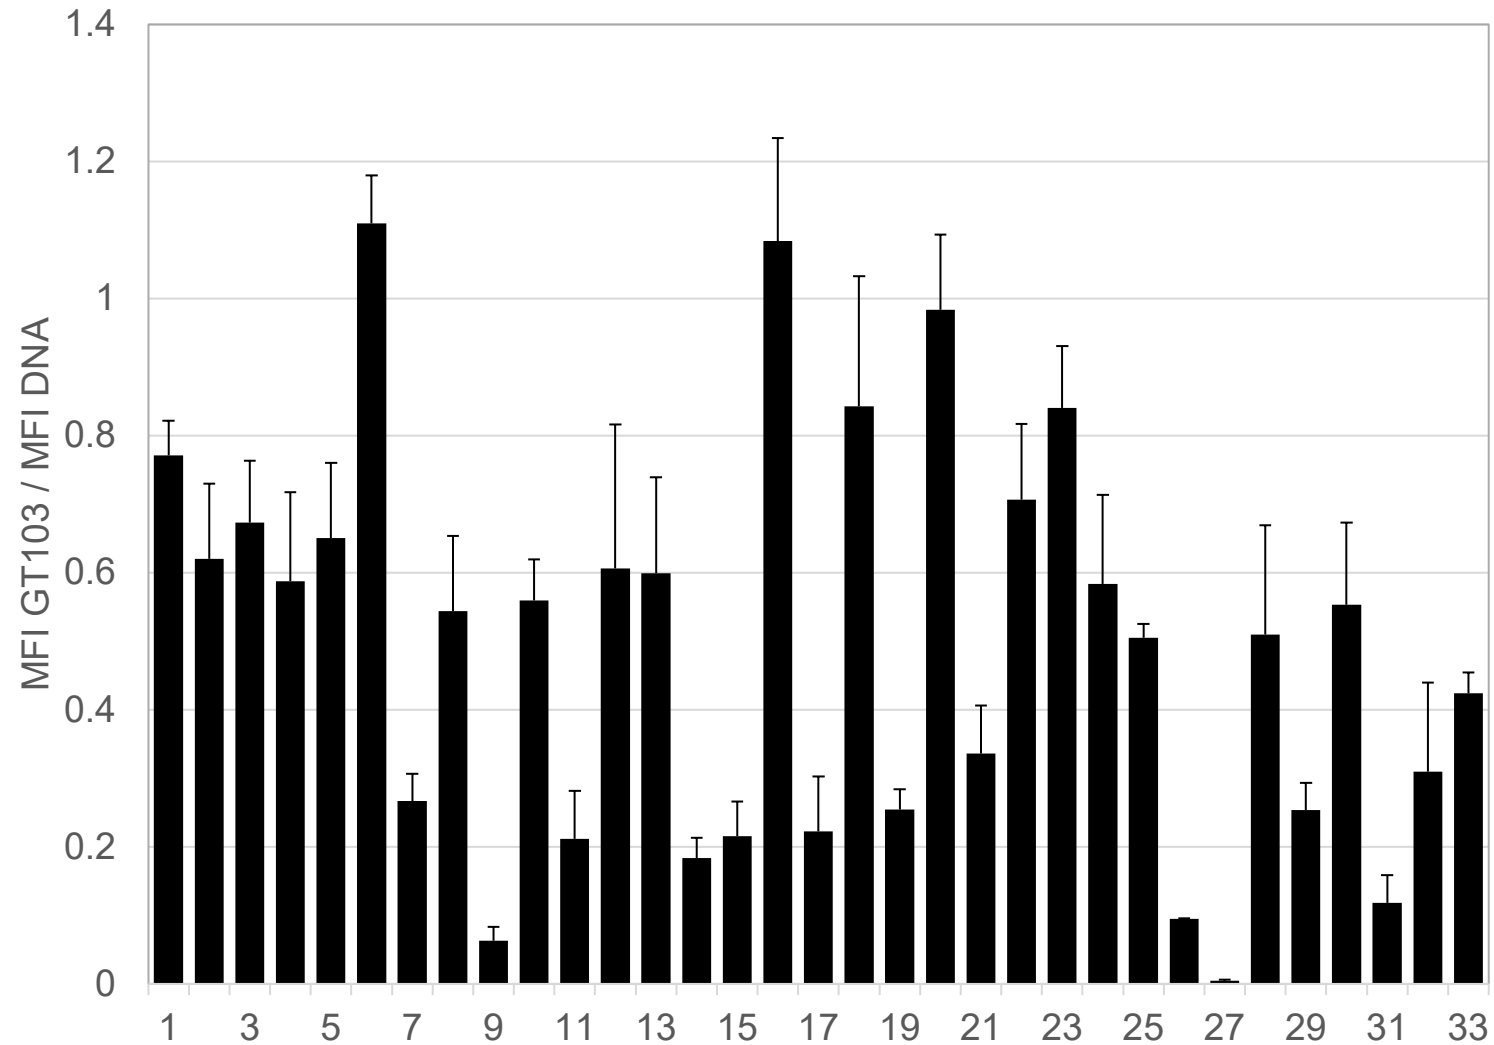

**Figure S1. Immunofluorescence of 33 human lung tumor samples on a microarray probed with GT103.** Fluorescence for each spot was measured in two different locations and the means +/- standard deviation determined.
